# Supplementary material for: Effect of Finger Gnosis on Young Chinese Children’s Addition Skills
Source: Front Psychol. 2020 Sep 30;11:544543. doi: 10.3389/fpsyg.2020.544543 (PMC7554299; doi:10.3389/fpsyg.2020.544543)
Supplement: Supplementary file 1 [file Table_1.XLSX]

## Sheet: Study 1
id	gender	music	Class	Age	FingerCounting	OralCounting	Decomposition	RetrievalStrategy	OtherStrategy	AdditionAccuracy	FingerGnosis
42	0	1	2	73	3.33	13.33	10	66.67	6.66	97	73
43	1	0	2	63	6.67	36.67	3.33	53.33	0	93	90
44	0	0	2	70	66.67	33.33	0	0	0	97	87
45	0	0	2	70	36.67	53.33	0	10	0	93	87
46	0	1	2	68	36.67	63.33	0	0	0	47	97
47	0	1	2	67	0	96.67	0	3.33	0	100	90
48	1	1	2	67	100	0	0	0	0	100	85
50	1	0	2	66	3.33	36.67	0	53.33	6.67	47	70
51	1	0	2	66	46.66	10	0	43.33	0	83	62
52	1	0	2	66	20	46.67	13.33	20	0	97	83
54	0	0	2	60	30	66.67	0	3.33	0	93	82
56	1	0	2	65	0	0	0	100	0	100	80
57	1	0	2	65	40	26.67	0	0	33.33	47	67
58	1	0	2	64	23.33	13.33	0	36.67	26.67	53	50
59	0	0	2	64	0	100	0	0	0	37	77
61	0	1	2	61	3.33	96.67	0	0	0	100	83
64	0	0	2	63	3.33	70	0	20	6.67	77	65
65	1	0	2	63	10	13.33	3.33	73.33	0	100	62
66	0	0	2	61	60	0	0	0	40	40	73
67	0	1	2	61	0	30	6.67	63.33	0	100	88
68	0	0	2	61	46.66	0	0	13.33	40	43	80
69	0	0	2	60	26.67	0	0	0	73.33	27	58
70	0	1	2	60	0	96.67	0	3.33	0	57	90
71	1	0	2	61	10	3.33	0	40	46.66	53	55
72	1	1	2	69	20	70	0	10	0	63	90
73	0	0	2	62	40	0	0	0	60	40	78
74	1	1	2	71	36.67	43.33	0	20	0	77	87
75	0	0	2	61	100	0	0	0	0	63	67
76	1	1	2	71	40	0	0	0	60	40	80
77	1	1	2	74	0	0	0	96.67	3.33	87	67
78	1	1	2	71	0	0	0	3.33	96.67	100	80
80	1	1	2	75	0	60	10	30	0	100	92
81	1	1	2	71	96.67	3.33	0	0	0	97	65
82	1	0	2	74	0	13.33	20	66.67	0	100	82
83	1	1	2	67	100	0	0	0	0	93	70
84	0	0	3	70	63.33	0	0	0	36.67	70	78
85	0	1	3	69	40	0	0	0	60	37	60
86	0	1	3	67	40	0	0	0	60	37	45
88	0	1	3	67	30	46.67	0	23.33	0	80	90
89	0	0	3	64	76.67	6.67	0	3.33	13.34	73	67
90	0	1	3	63	90	0	3.33	3.33	3.33	83	80
91	0	0	3	71	30	6.67	0	63.33	0	90	72
92	0	0	3	71	40	33.33	3.33	23.33	0	100	75
93	0	0	3	69	100	0	0	0	0	70	67
94	0	1	3	69	96.67	0	0	0	3.33	80	92
97	0	0	3	64	86.66	10	0	3.33	0	83	82
99	0	0	3	67	93.33	0	0	0	6.67	53	85
100	1	0	3	72	43.33	0	10	23.33	23.33	73	95
102	1	1	3	68	33.33	30	6.67	20	10	90	82
103	1	1	3	64	0	0	0	0	100	3	42
104	0	1	3	71	40	20	6.67	33.33	0	87	85
106	1	1	3	68	10	10	0	80	0	83	85
107	1	1	3	68	100	0	0	0	0	93	82
108	1	1	3	67	0	0	0	100	0	100	80
110	1	0	3	62	0	0	0	0	100	3	72
113	1	0	3	64	90	0	3.33	6.67	0	80	67
115	1	0	3	73	100	0	0	0	0	53	78
116	0	1	3	72	80	0	0	0	20	40	97
117	0	0	3	66	63.33	0	0	36.67	0	100	82
118	1	1	3	70	0	6.67	53.33	36.67	3.33	93	73
119	1	0	3	74	0	70	10	20	0	90	65
120	1	1	3	83	10	36.67	0	53.33	0	97	80
121	0	0	3	74	0	33.33	0	66.67	0	87	97
122	1	0	3	71	76.67	6.67	0	16.67	0	97	70
123	1	1	3	77	56.67	30	6.67	6.67	0	93	90
124	0	0	3	70	100	0	0	0	0	100	82
125	1	1	4	64	36.67	0	0	0	63.33	30	77
126	0	1	4	62	100	0	0	0	0	60	85
127	0	1	4	63	96.67	3.33	0	0	0	100	90
128	0	0	4	63	100	0	0	0	0	37	80
129	0	0	4	68	100	0	0	0	0	67	70
130	0	0	4	68	10	73.33	3.33	13.33	0	100	88
131	0	0	4	69	0	86.67	6.67	6.67	0	90	70
132	0	1	4	68	100	0	0	0	0	73	92
133	0	1	4	69	0	0	0	0	100	100	90
134	0	1	4	69	43.33	53.33	0	3.33	0	93	87
135	0	0	4	70	96.66	3.33	0	0	0	90	80
136	0	1	4	71	93.33	0	0	0	6.67	80	82
137	1	1	4	60	73.33	0	0	26.67	0	100	72
138	1	1	4	61	46.66	23.33	0	23.33	6.67	93	68
139	1	0	4	61	20	76.67	0	3.33	0	67	75
141	1	0	4	62	0	93.33	0	6.67	0	93	67
142	1	0	4	65	40	0	0	0	60	40	67
143	1	0	4	68	46.67	0	16.67	3.33	33.33	50	80
144	1	0	4	68	76.67	13.33	3.33	3.33	3.33	90	67
145	1	0	4	68	56.66	0	0	6.67	36.67	60	88
146	1	1	4	68	96.66	0	0	0	3.33	87	88
147	1	0	4	70	10	0	0	0	90	60	82
148	1	1	4	71	56.66	0	0	0	43.33	37	82
149	1	0	4	72	100	0	0	0	0	93	85
151	1	0	4	70	96.67	0	0	0	3.33	43	50
152	0	0	4	70	0	100	0	0	0	63	70
153	1	0	4	67	46.67	0	3.33	50	0	100	75
154	0	0	4	74	80	0	3.33	13.33	3.33	100	95
155	1	1	4	73	0	0	33.33	66.67	0	100	65
156	1	0	4	73	3.33	63.33	0	33.33	0	100	80
157	0	0	4	73	43.33	43.33	0	6.67	6.67	87	87
158	0	0	4	72	0	56.67	6.67	36.67	0	87	90
160	0	0	4	74	50	6.67	13.33	23.33	6.67	90	75
161	1	1	4	76	0	0	16.67	83.33	0	100	80
163	0	1	4	74	0	0	23.33	66.67	10	93	92
165	0	1	4	76	93.33	0	6.67	0	0	100	90
